# Supplementary material
Source: Research Square preprint supplement (doi:10.21203/rs.3.rs-9733213/v1)
Supplement: Supplementary file 1 [file f5a42065933223752d332fa7.xlsx]

## Sheet: Summary
Supplementary Tables	Description
S1	Sequences of primers ued in PCR, qRT-PCR and 3'RACE
S2	Sequences of LNA/DNA mixmer ASOs, miRNA mimics and CRISPR crRNAs
S3	Primary and secondary antibodies

## Sheet: S1
Primer	Sequence (5’ > 3’)
oligo-dT_Anchor	GACCACGCGTATCGATGTCGACTTTTTTTTTTTTTTTT
Anchor_R	GACCACGCGTATCGATGTCGAC
F1	ACCAAGCCGATGAAGAAGCA
F1_nested	GATGCCTGGCAAATTGAAGT
F4_nested	AGCTCACCCCAAAGATGATG
F3_nested	GTAATGCCAGCCTTGTTGCT
NFYA_short_F	GATCTCCAGAGTGGACAGGAAT
NFYA_long_F	TGTGCAGTTGCAGACTGAGG
NFYA_tot_F	TCAATTCAGGAGGGATGGTC
NFYA_tot_R	GCCGAGACTCATGCAGGTAT
PrA_F	GATGCCTGGCAAATTGAAGT
PrA_R	AGGTTGTTCTTCCCTGCTGA
PrB_F	AAGCTTGAGGTGGATGTTGG
PrB_R	TGCAGGCATGTTTCTTTCAG
PrC_F	TGGACCAACAGAGCATTTTG
PrC_R	ATACTGCTGGGGGAAAAACC
PrD_F	GCCAGTGGAACCTGTCCTTA
PrD_R	TCCTACGATAAAGCCGTTGG
luc2_F	GCTCAGCAAGGAGGTAGGTG
luc2_R	TCTTACCGGTGTCCAAGTCC
rluc_F	AATCGGACCCAGGATTCTTTv
rluc_R	ACTCGCTCAACGAACGATTT
seq_pGL4_F	GTGGTGTTGTGTTCGTGGAC
RPS20_F	GCGCCTCTTATCAAGTCAGC
RPS20_R	CGGAAAAACACCCGTGGAG
CCND1_F	CCTGTCCTACTACCGCCTCA
CCND1_R	TCCTCCTCTTCCTCCTCCTC
CMYC_F	GAGGCGAACACACAACGTCTT
CMYC_R	CGCAACAAGTCTCTTCAGAAA
MALAT1_F	GACGGAGGTTGAGATGAAGC
MALAT1_R	ATTCGGGGCTCTGTAGTCCT
GAPDH_F	GCCTCAAGATCATCAGCAATGC
GAPDH_R	CCACGATACCAAAGTTGTCATGG
CRISPR_del_F	GGCAGGGTATTGACATTTGG
CRISPR_del_R	CGGCTAATTTTCCTCATGGA

## Sheet: S2
Oligo	Type	Sequence (5’ > 3’)
ASO-NEG	LNA/DNA mixmer ASO	TAACACGTCTATACGCCCA
ASO-A1	LNA/DNA mixmer ASO	ATCTCAGGAATTTATTGTTT
ASO-B2	LNA/DNA mixmer ASO	TCTGCAGTTTATTCTCACAG
ASO-B3	LNA/DNA mixmer ASO	ACCAATTTTTATTCTTGGTA
ASO-C4	LNA/DNA mixmer ASO	CGGTTATTTTTATAAATTTATT
ASO-D5	LNA/DNA mixmer ASO	GAATACTTTATTTTGAAA
miR-NEG	miRNA mimic
miR-140-5p	miRNA mimic	mature miRNA: CAGUGGUUUUACCCUAUGGUAG	stem loop: ACCAUAGGGUAAAACCACUG TT
miR-132-3p	miRNA mimic	mature miRNA: UAACAGUCUACAGCCAUGGUCG	stem loop: ACCAUGGCUGUAGACUGUUA TT
miR-518d-5p	miRNA mimic	mature miRNA: CUCUAGAGGGAAGCACUUUCUG	stem loop: GAAAGUGCUUCCCUCUAGAG TT
miR-22-3p	miRNA mimic	mature miRNA: AAGCUGCCAGUUGAAGAACUGU	stem loop: AGUUCUUCAACUGGCAGCUU TT
miR-153-3p	miRNA mimic	mature miRNA: UUGCAUAGUCACAAAAGUGAUC	stem loop: UCACUUUUGUGACUAUGCAA TT
g1	CRISPR crRNA	TTGGGATTCAACTATATCG
g2	CRISPR crRNA	ATGCAGACAAGTCTTGTCG

## Sheet: S3
Primary antibody	Species	Dilution	Supplier
Anti-Vinculin	Mouse	1:5,000	Sigma-Aldrich, Saint Louis, MI, USA
Anti-NF-YA	Mouse	1:1,000	Santa Cruz Biotechnology Inc., Dallas, TX, USA
Anti-CCND1	Rabbit	1:500	Cell Signaling Technology Inc., Danvers, MA, USA
Secondary antibody	Species	Dilution	Supplier
Anti-Mouse	Mouse	1:10,000	Sigma-Aldrich, Saint Louis, MI, USA
Anti-Rabbit	Rabbit	1:10,000	Sigma-Aldrich, Saint Louis, MI, USA
